# Supplementary material
Source: Springer Nature journal article supplement (https://www.springermedizin.de/resource/supplementary/12985_2008_506_MOESM3_ESM.pdf/9607900)
Supplement: MOESM3 [file 9607900]

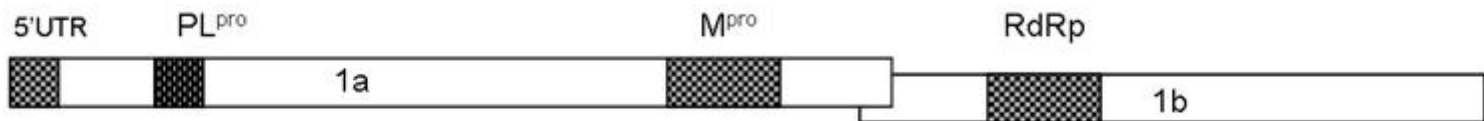

-  Gray like
-  Gray/Conn/Ark99 like
-  Not Available

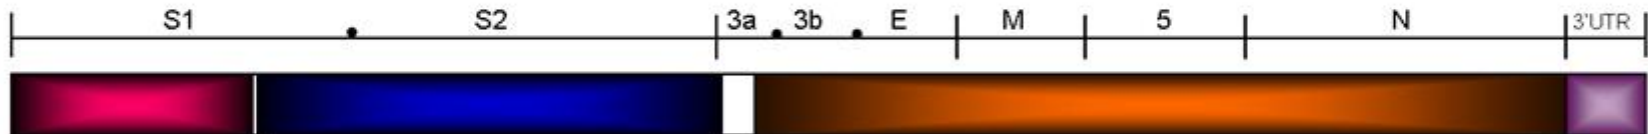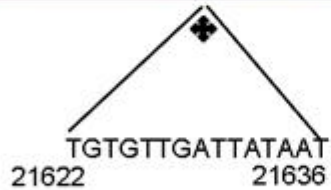

-  Ark99 like
-  JMK like
-  ? Unknown
-  Conn like
-  Ark99/ ?Conn like
-  Recombination site
